# Supplementary material
Source: Research Square preprint supplement (doi:10.21203/rs.3.rs-10261069/v1)
Supplement: Supplementary file 1 [file 468547c49365eb974f4b07cd.docx]

**Supplementary material**

Development and temporal validation of an interpretable machine learning model with a prototype web-enabled decision-support framework for early identification of depression risk in middle-aged and older adults using the CHARLS cohort

# Supplementary Table S1. TRIPOD+AI checklist summary

| TRIPOD+AI domain | Manuscript location or note |
| --- | --- |
| Title/abstract | Identifies prediction modelling, temporal validation, CHARLS data and prototype web-deployment framework. |
| Introduction | States clinical/public health motivation and explains incremental contribution relative to previous CHARLS depression ML studies. |
| Source of data | Describes CHARLS waves, public data source, eligibility and person-wave construction. |
| Participants | Reports baseline depression-free eligibility, unique individuals, person-wave observations and temporal split. |
| Outcome | Defines incident CES-D10 depressive symptoms among observations with baseline CES-D10 score below 10. |
| Predictors | Lists core and extended predictors; flags insurance-related variable and high-missingness extended variables. |
| Sample size | Reports n, events and event rate in training/test sets; event-per-variable considerations are discussed indirectly. |
| Missing data | Uses training-set median/mode imputation plus missing indicators; discloses structural and item-level missingness. |
| Model development | Compares six conventional algorithms across core and extended feature sets; grouped five-fold CV used in development. |
| Model performance | Reports AUC, PR-AUC, Brier score, calibration, DCA and threshold-dependent metrics. |
| Model selection | Uses rank-based composite score based on temporal test AUC, F1 and Brier score for diagnostic plots. |
| Validation | Uses internal temporal test set; explicitly states this is not independent external validation. |
| Interpretability | Uses permutation importance; avoids claiming SHAP or causal interpretation. |
| Clinical use | Frames output as screening/risk communication only, not diagnosis. |
| Limitations | Discusses repeated observations, no cluster-bootstrap CI in main text, horizon heterogeneity, missingness and no external cohort. |

# Supplementary Table S2. Five-fold grouped cross-validation fold-level AUC

| Model | Feature set | Fold | Validation sample size | Validation events | Validation event rate | Fold AUC | Grouping |
| --- | --- | --- | --- | --- | --- | --- | --- |
| Logistic regression | Core | 1 | 5742 | 1308 | 0.228 | 0.654 | Participant identifier |
| Logistic regression | Core | 2 | 5741 | 1248 | 0.217 | 0.663 | Participant identifier |
| Logistic regression | Core | 3 | 5741 | 1284 | 0.224 | 0.658 | Participant identifier |
| Logistic regression | Core | 4 | 5741 | 1265 | 0.220 | 0.646 | Participant identifier |
| Logistic regression | Core | 5 | 5741 | 1318 | 0.230 | 0.642 | Participant identifier |
| Random forest | Core | 1 | 5742 | 1308 | 0.228 | 0.659 | Participant identifier |
| Random forest | Core | 2 | 5741 | 1248 | 0.217 | 0.665 | Participant identifier |
| Random forest | Core | 3 | 5741 | 1284 | 0.224 | 0.658 | Participant identifier |
| Random forest | Core | 4 | 5741 | 1265 | 0.220 | 0.648 | Participant identifier |
| Random forest | Core | 5 | 5741 | 1318 | 0.230 | 0.648 | Participant identifier |
| Gradient boosting | Core | 1 | 5742 | 1308 | 0.228 | 0.665 | Participant identifier |
| Gradient boosting | Core | 2 | 5741 | 1248 | 0.217 | 0.664 | Participant identifier |
| Gradient boosting | Core | 3 | 5741 | 1284 | 0.224 | 0.659 | Participant identifier |
| Gradient boosting | Core | 4 | 5741 | 1265 | 0.220 | 0.647 | Participant identifier |
| Gradient boosting | Core | 5 | 5741 | 1318 | 0.230 | 0.649 | Participant identifier |
| Extra trees | Core | 1 | 5742 | 1308 | 0.228 | 0.651 | Participant identifier |
| Extra trees | Core | 2 | 5741 | 1248 | 0.217 | 0.662 | Participant identifier |
| Extra trees | Core | 3 | 5741 | 1284 | 0.224 | 0.657 | Participant identifier |
| Extra trees | Core | 4 | 5741 | 1265 | 0.220 | 0.644 | Participant identifier |
| Extra trees | Core | 5 | 5741 | 1318 | 0.230 | 0.642 | Participant identifier |
| Histogram gradient boosting | Core | 1 | 5742 | 1308 | 0.228 | 0.660 | Participant identifier |
| Histogram gradient boosting | Core | 2 | 5741 | 1248 | 0.217 | 0.665 | Participant identifier |
| Histogram gradient boosting | Core | 3 | 5741 | 1284 | 0.224 | 0.655 | Participant identifier |
| Histogram gradient boosting | Core | 4 | 5741 | 1265 | 0.220 | 0.645 | Participant identifier |
| Histogram gradient boosting | Core | 5 | 5741 | 1318 | 0.230 | 0.646 | Participant identifier |
| Calibrated linear SVM | Core | 1 | 5742 | 1308 | 0.228 | 0.653 | Participant identifier |
| Calibrated linear SVM | Core | 2 | 5741 | 1248 | 0.217 | 0.663 | Participant identifier |
| Calibrated linear SVM | Core | 3 | 5741 | 1284 | 0.224 | 0.658 | Participant identifier |
| Calibrated linear SVM | Core | 4 | 5741 | 1265 | 0.220 | 0.646 | Participant identifier |
| Calibrated linear SVM | Core | 5 | 5741 | 1318 | 0.230 | 0.642 | Participant identifier |
| Logistic regression | Extended | 1 | 5742 | 1308 | 0.228 | 0.668 | Participant identifier |
| Logistic regression | Extended | 2 | 5741 | 1248 | 0.217 | 0.672 | Participant identifier |
| Logistic regression | Extended | 3 | 5741 | 1284 | 0.224 | 0.673 | Participant identifier |
| Logistic regression | Extended | 4 | 5741 | 1265 | 0.220 | 0.658 | Participant identifier |
| Logistic regression | Extended | 5 | 5741 | 1318 | 0.230 | 0.659 | Participant identifier |
| Random forest | Extended | 1 | 5742 | 1308 | 0.228 | 0.665 | Participant identifier |
| Random forest | Extended | 2 | 5741 | 1248 | 0.217 | 0.669 | Participant identifier |
| Random forest | Extended | 3 | 5741 | 1284 | 0.224 | 0.673 | Participant identifier |
| Random forest | Extended | 4 | 5741 | 1265 | 0.220 | 0.657 | Participant identifier |
| Random forest | Extended | 5 | 5741 | 1318 | 0.230 | 0.661 | Participant identifier |
| Gradient boosting | Extended | 1 | 5742 | 1308 | 0.228 | 0.673 | Participant identifier |
| Gradient boosting | Extended | 2 | 5741 | 1248 | 0.217 | 0.673 | Participant identifier |
| Gradient boosting | Extended | 3 | 5741 | 1284 | 0.224 | 0.671 | Participant identifier |
| Gradient boosting | Extended | 4 | 5741 | 1265 | 0.220 | 0.661 | Participant identifier |
| Gradient boosting | Extended | 5 | 5741 | 1318 | 0.230 | 0.667 | Participant identifier |
| Extra trees | Extended | 1 | 5742 | 1308 | 0.228 | 0.657 | Participant identifier |
| Extra trees | Extended | 2 | 5741 | 1248 | 0.217 | 0.668 | Participant identifier |
| Extra trees | Extended | 3 | 5741 | 1284 | 0.224 | 0.665 | Participant identifier |
| Extra trees | Extended | 4 | 5741 | 1265 | 0.220 | 0.652 | Participant identifier |
| Extra trees | Extended | 5 | 5741 | 1318 | 0.230 | 0.653 | Participant identifier |
| Histogram gradient boosting | Extended | 1 | 5742 | 1308 | 0.228 | 0.671 | Participant identifier |
| Histogram gradient boosting | Extended | 2 | 5741 | 1248 | 0.217 | 0.675 | Participant identifier |
| Histogram gradient boosting | Extended | 3 | 5741 | 1284 | 0.224 | 0.668 | Participant identifier |
| Histogram gradient boosting | Extended | 4 | 5741 | 1265 | 0.220 | 0.660 | Participant identifier |
| Histogram gradient boosting | Extended | 5 | 5741 | 1318 | 0.230 | 0.664 | Participant identifier |
| Calibrated linear SVM | Extended | 1 | 5742 | 1308 | 0.228 | 0.667 | Participant identifier |
| Calibrated linear SVM | Extended | 2 | 5741 | 1248 | 0.217 | 0.672 | Participant identifier |
| Calibrated linear SVM | Extended | 3 | 5741 | 1284 | 0.224 | 0.673 | Participant identifier |
| Calibrated linear SVM | Extended | 4 | 5741 | 1265 | 0.220 | 0.658 | Participant identifier |
| Calibrated linear SVM | Extended | 5 | 5741 | 1318 | 0.230 | 0.659 | Participant identifier |

# Supplementary Table S3. Five-fold grouped cross-validation AUC summary by model and feature set

| Model | Feature set | Cross-validation AUC, mean | Cross-validation AUC, SD | Cross-validation folds | Grouping |
| --- | --- | --- | --- | --- | --- |
| Extra trees | Core | 0.651 | 0.008 | 5 | Participant identifier |
| Gradient boosting | Core | 0.657 | 0.008 | 5 | Participant identifier |
| Histogram gradient boosting | Core | 0.654 | 0.008 | 5 | Participant identifier |
| Calibrated linear SVM | Core | 0.652 | 0.009 | 5 | Participant identifier |
| Logistic regression | Core | 0.652 | 0.009 | 5 | Participant identifier |
| Random forest | Core | 0.656 | 0.008 | 5 | Participant identifier |
| Extra trees | Extended | 0.659 | 0.007 | 5 | Participant identifier |
| Gradient boosting | Extended | 0.669 | 0.005 | 5 | Participant identifier |
| Histogram gradient boosting | Extended | 0.668 | 0.006 | 5 | Participant identifier |
| Calibrated linear SVM | Extended | 0.666 | 0.007 | 5 | Participant identifier |
| Logistic regression | Extended | 0.666 | 0.007 | 5 | Participant identifier |
| Random forest | Extended | 0.665 | 0.006 | 5 | Participant identifier |

# Supplementary Table S4. Key model hyperparameters

| Model | Key hyperparameters |
| --- | --- |
| Logistic regression | Maximum iterations: 2000; class weight: balanced; solver: liblinear |
| Random forest | Number of estimators: 250; minimum samples per leaf: 8; class weight: balanced subsample |
| Gradient boosting | Default gradient boosting classifier settings in scikit-learn; random seed fixed |
| Extra trees | Number of estimators: 250; minimum samples per leaf: 8; class weight: balanced |
| Histogram gradient boosting | Maximum iterations: 200; learning rate: 0.05; random seed fixed |
| Calibrated linear SVM | Linear support vector classifier with balanced class weights and maximum iterations of 5000; calibrated using three-fold cross-validation |

# Supplementary Table S5. Participant-level cluster bootstrap 95% confidence intervals for the composite-selected model

| Metric | Point estimate | Bootstrap lower 95% CI | Bootstrap upper 95% CI | Bootstrap replicates | Cluster variable |
| --- | --- | --- | --- | --- | --- |
| AUC | 0.686 | 0.673 | 0.699 | 1000 | Participant identifier |
| Sensitivity | 0.726 | 0.708 | 0.744 | 1000 | Participant identifier |
| Specificity | 0.535 | 0.524 | 0.547 | 1000 | Participant identifier |
| Accuracy | 0.579 | 0.569 | 0.590 | 1000 | Participant identifier |
| Precision | 0.320 | 0.308 | 0.333 | 1000 | Participant identifier |
| F1 score | 0.444 | 0.430 | 0.459 | 1000 | Participant identifier |
| Brier score | 0.164 | 0.160 | 0.168 | 1000 | Participant identifier |
| PR-AUC | 0.396 | 0.376 | 0.417 | 1000 | Participant identifier |

# Supplementary Table S6. Adjacent-only temporal test sensitivity analysis

| Analysis | All rows adjacent transitions | Minimum years to next wave | Maximum years to next wave | Threshold | Sample size | Events | Event rate | AUC | Sensitivity | Specificity | Accuracy | Precision | F1 score | Brier score | PR-AUC |
| --- | --- | --- | --- | --- | --- | --- | --- | --- | --- | --- | --- | --- | --- | --- | --- |
| Full temporal test set | Yes | 2.000 | 2.000 | 0.210 | 9179 | 2125 | 0.232 | 0.686 | 0.726 | 0.535 | 0.579 | 0.320 | 0.444 | 0.164 | 0.396 |
| Adjacent-only temporal test set | Yes | 2.000 | 2.000 | 0.210 | 9179 | 2125 | 0.232 | 0.686 | 0.726 | 0.535 | 0.579 | 0.320 | 0.444 | 0.164 | 0.396 |

Note. The locked 2018-2020 temporal test set contained only adjacent 2-year transitions; therefore, the adjacent-only temporal-test sensitivity analysis is numerically identical to the full temporal test set.

# Supplementary Table S7. Sensitivity analysis after removing the insurance-related indicator

| Model | Feature set | Data split | Threshold | Cross-validation AUC, mean | Cross-validation AUC, SD | Sample size | Events | Event rate | AUC | Accuracy | Sensitivity | Specificity | Precision | NPV | F1 score | Brier score | PR-AUC | True positives | True negatives | False positives | False negatives | Sensitivity analysis |
| --- | --- | --- | --- | --- | --- | --- | --- | --- | --- | --- | --- | --- | --- | --- | --- | --- | --- | --- | --- | --- | --- | --- |
| Gradient boosting | Core | 2018-2020 temporal test set | 0.220 | 0.657 | 0.008 | 9179 | 2125 | 0.232 | 0.689 | 0.683 | 0.538 | 0.727 | 0.373 | 0.839 | 0.440 | 0.165 | 0.401 | 1143 | 5129 | 1925 | 982 | Original analysis including insurance-related indicator |
| Calibrated linear SVM | Extended | 2018-2020 temporal test set | 0.210 | 0.666 | 0.007 | 9179 | 2125 | 0.232 | 0.686 | 0.579 | 0.726 | 0.535 | 0.320 | 0.866 | 0.444 | 0.164 | 0.396 | 1543 | 3776 | 3278 | 582 | Original analysis including insurance-related indicator |
| Gradient boosting | Core without insurance-related indicator | 2018-2020 temporal test set | 0.220 | Not recalculated | Not recalculated | 9179 | 2125 | 0.232 | 0.689 | 0.685 | 0.534 | 0.731 | 0.374 | 0.839 | 0.440 | 0.165 | 0.402 | 1135 | 5155 | 1899 | 990 | Sensitivity analysis excluding insurance-related indicator |
| Calibrated linear SVM | Extended without insurance-related indicator | 2018-2020 temporal test set | 0.210 | Not recalculated | Not recalculated | 9179 | 2125 | 0.232 | 0.686 | 0.580 | 0.729 | 0.535 | 0.321 | 0.868 | 0.446 | 0.164 | 0.396 | 1549 | 3776 | 3278 | 576 | Sensitivity analysis excluding insurance-related indicator |

Note. The sensitivity analysis was restricted to the two manuscript-relevant models: core gradient boosting and extended calibrated linear support vector machine. Removing the insurance-related indicator produced negligible changes in AUC, F1 and Brier score.
